# Supplementary material for: Induction of Apoptosis in Pancreatic Cancer Cells by CDDO-Me Involves Repression of Telomerase through Epigenetic Pathways
Source: PubMed Central journal article supplement (PMC4139055; doi:10.4172/2157-2518.1000177), 2014-05-31
Supplement: NIHMS613814-supplement-Fig__S1.pdf [file NIHMS613814-supplement-Fig__S1.pdf]

Panc-1

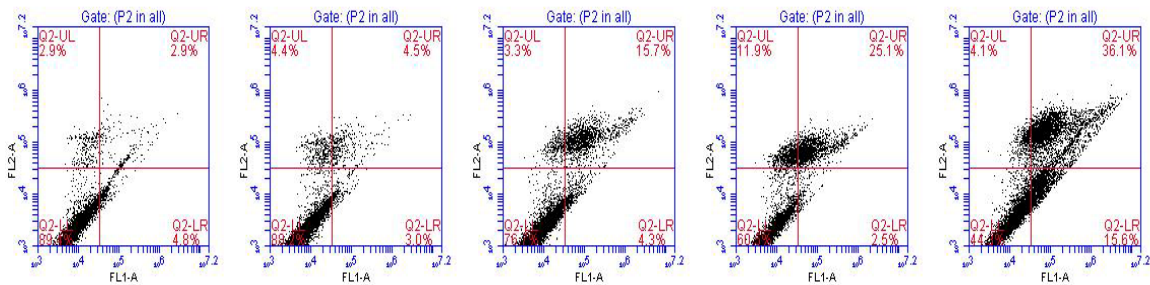

MiaPaCa-2

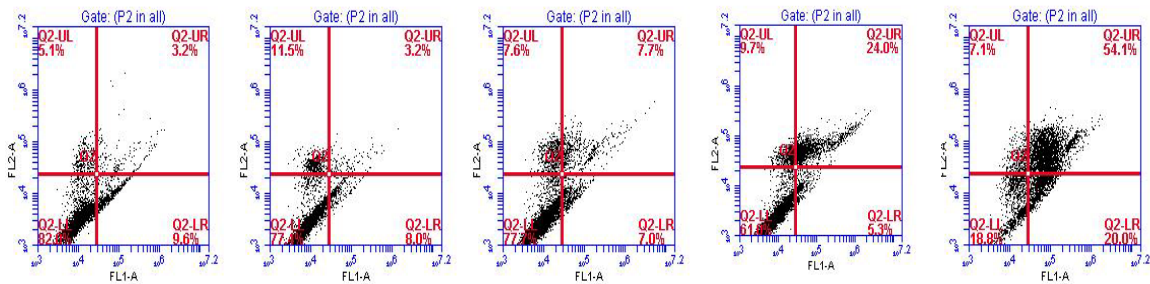

0.0

0.062

0.125

0.25

0.5

Concentration of CDDO-Me (μM)

Fig. S1. Flow cytographs showing annexin V-FITC/PI staining.
